# Supplementary material for: Hot Melt Extruded Posaconazole-Based Amorphous Solid Dispersions—The Effect of Different Types of Polymers
Source: MDPI journal article supplement (doi:10.3390/pharmaceutics15030799), 2023-02-28
Supplement: s1 [file s1]

## Supplementary Materials

### *Hot melt extruded posaconazole-based amorphous solid dispersions – the effect of different types of polymers*

**Daniel Kramarczyk <sup>1,\*</sup>, Justyna Knapik-Kowalczyk <sup>1,\*</sup>, Mateusz Kurek <sup>2</sup>, Witold Jamróz <sup>2</sup>, Renata Jachowicz <sup>2</sup> and Marian Paluch <sup>1</sup>**

<sup>1</sup> Faculty of Science and Technology, Institute of Physics, University of Silesia in Katowice, SMCEBI, 75 Pułku Piechoty 1a, 41-500 Chorzów, Poland;

<sup>2</sup> Faculty of Pharmacy, Department of Pharmaceutical Technology and Biopharmaceutics, Jagiellonian University, Medyczna 9, 30-688 Kraków, Poland;

\* Correspondence: daniel.kramarczyk@smcebi.edu.pl (DK); justyna.knapik-kowalczyk@us.edu.pl (JKK), Tel.: 0048 32 3497629;

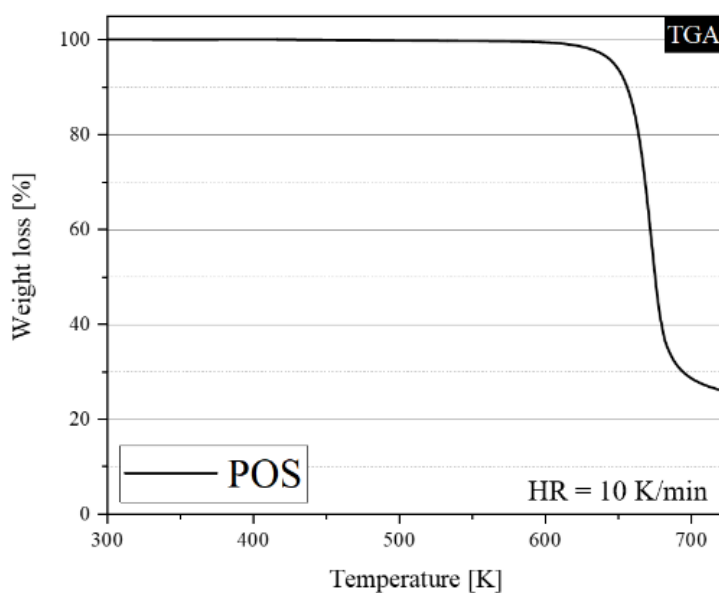

**Figure S1. TGA of neat POS**

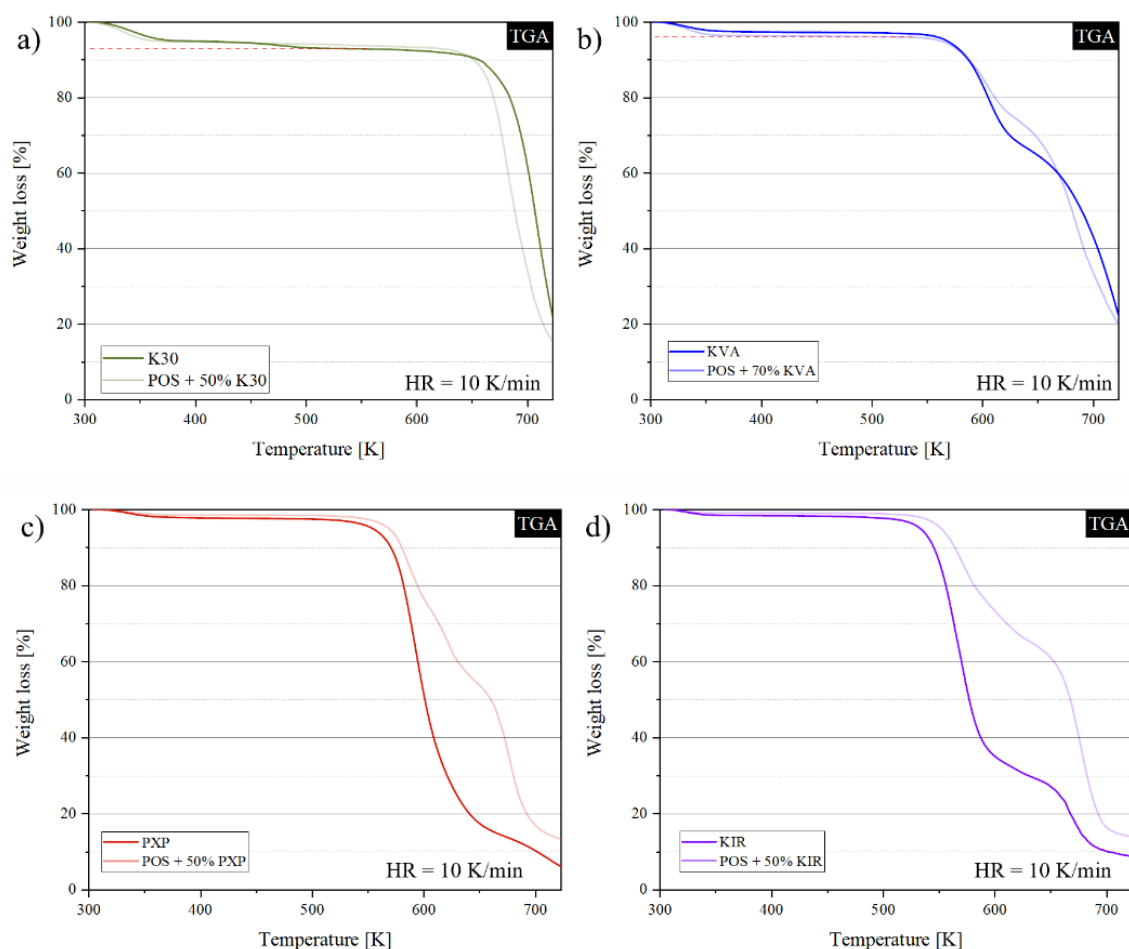

**Figure S2. TGA of (a) neat K30, and POS + 50% K30; (b) neat KVA and POS + 70% KVA; (c) neat PXP and POS + 50% PXP; d) neat KIR and POS + 50% KIR**

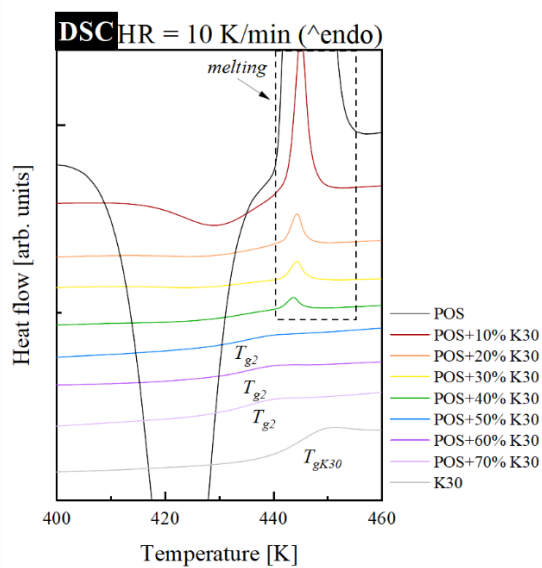

**Figure S3. Zoomed area of Figure 3a showing separation of  $T_g$ s and POS's recrystallization from the systems containing POS + K30**

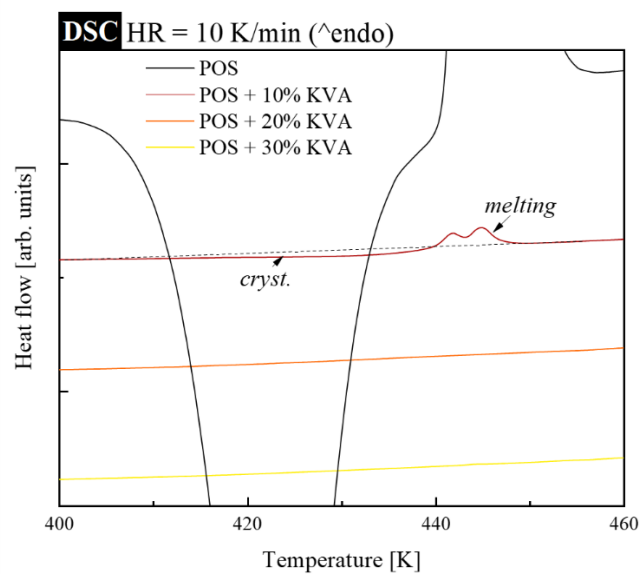

Figure S4. Zoomed area of Figure 3b showing recrystallization of POS from the system containing POS + 10% KVA

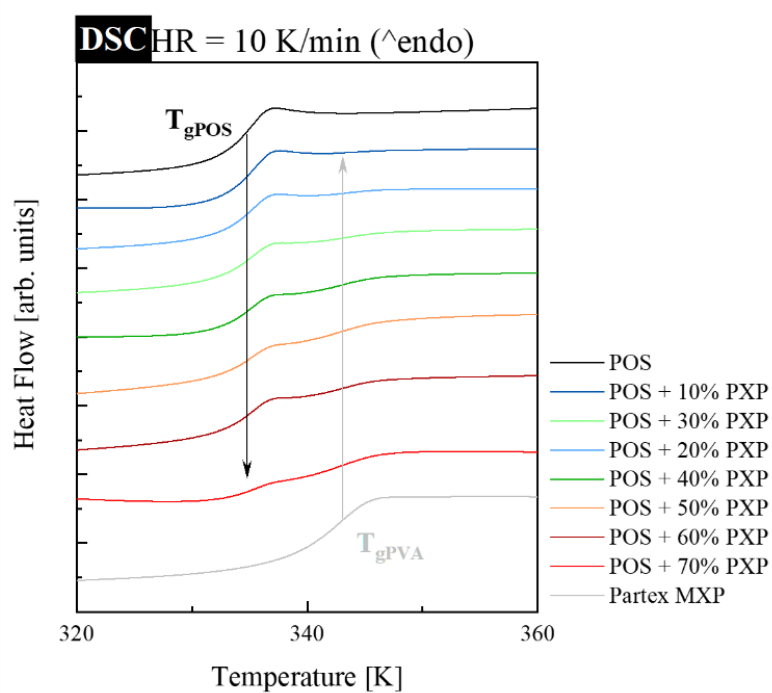

Figure S5. Zoomed area of Figure 3c showing separation of POS and PXP glass transitions in the systems of POS + PXP

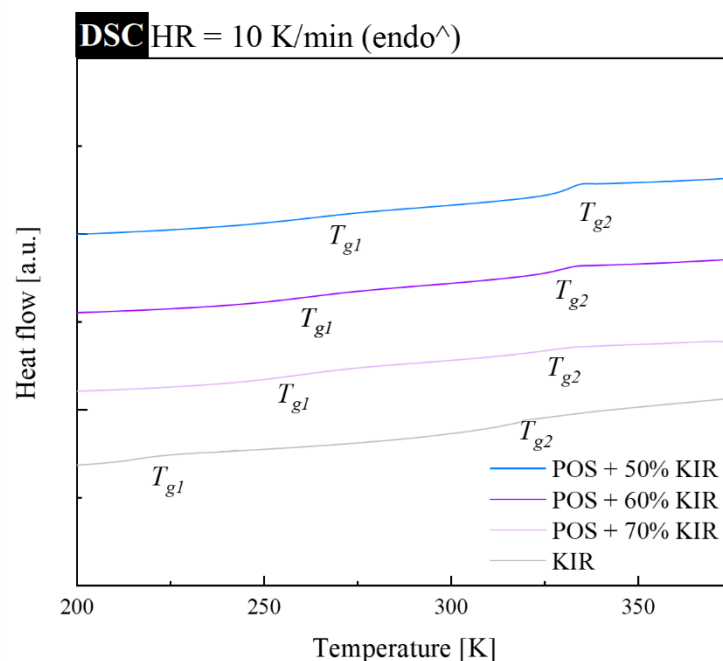

**Figure S6.** Zoomed area of Figure 3d showing appearance of two glass transition events in the neat KIR polymer, as well as the influence of POS on their values

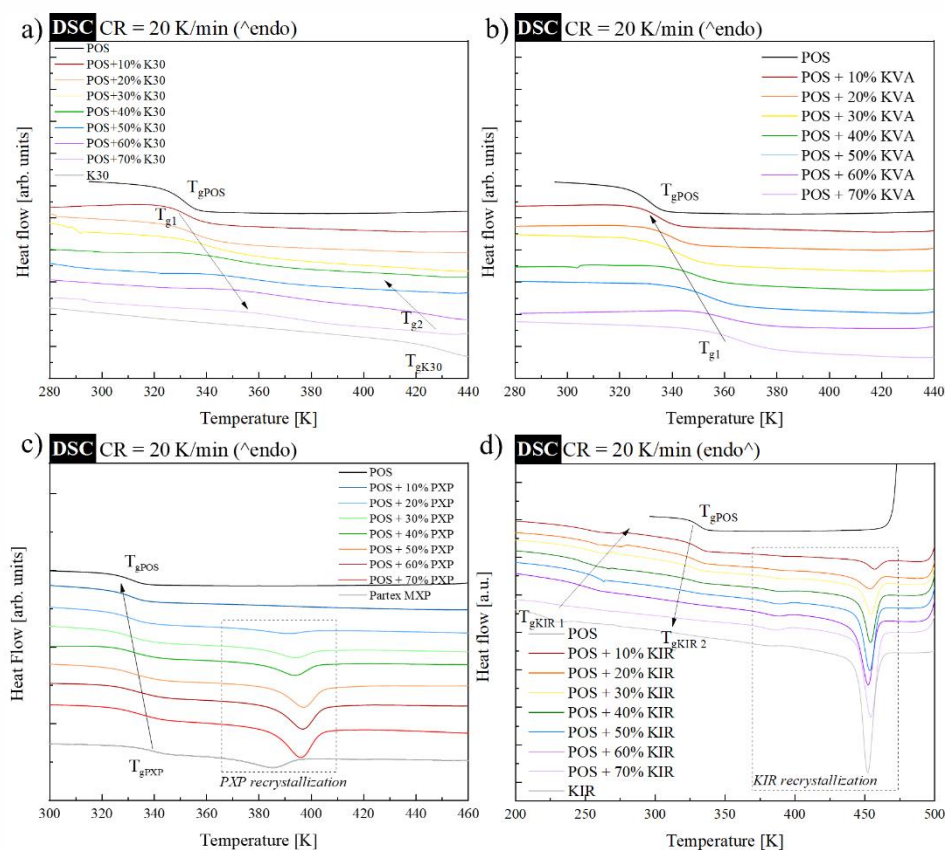

**Figure S7.** DSC thermograms obtained on cooling with a rate of 20 K/min of melted physical mixtures containing POS and, from 10 – 70wt. %, of (a) Kollidon 30 (K30), (b) Kollidon VA64 (KVA), (c) Parteck

**MXP (PXP), and (d) Kollicoat IR (KIR). In each panel, the higher thermogram represents a DSC trace of neat POS, while the lowest thermogram originates from neat polymer.**
